1 **Compartmental and spatial rule-based modeling with *Virtual Cell* (VCell)**

2

3 **M. L. Blinov,\* J. C. Schaff, D. Vasilescu, I. I. Moraru, J. E. Bloom and L. M. Loew\***

4

5

6

7 **Running title: Compartmental rule-based modeling in VCell**

8

9

10 **Keywords: Virtual Cell (VCell), rule-based modeling, compartments**

11 **Abstract**

12 In rule-based modeling, molecular interactions are systematically specified in the form of reaction rules  
13 that serve as generators of reactions. This provides a way to account for all the potential molecular  
14 complexes and interactions among multivalent or multistate molecules. Recently, we introduced rule-  
15 based modeling into the Virtual Cell (VCell) modeling framework, permitting graphical specification of  
16 rules and merger of networks generated automatically (using the BioNetGen modeling engine) with  
17 hand-specified reaction networks. VCell provides a number of ordinary differential equation (ODE) and  
18 stochastic numerical solvers for single-compartment simulations of the kinetic systems derived from  
19 these networks, and agent-based network-free simulation of the rules. In this work, compartmental and  
20 spatial modeling of rule-based models has been implemented within VCell. To enable rule-based  
21 deterministic and stochastic spatial simulations and network-free agent-based compartmental  
22 simulations, the BioNetGen and NFSim engines were each modified to support compartments. In the  
23 new rule-based formalism, every reactant and product pattern and every reaction rule are assigned  
24 locations. We also introduce the novel rule-based concept of molecular anchors. This assures that any  
25 species that has a molecule anchored to a predefined compartment will remain in this compartment.  
26 Importantly, in addition to formulation of compartmental models, this now permits VCell users to  
27 seamlessly connect reaction networks derived from rules to explicit geometries to automatically  
28 generate a system of reaction-diffusion equations. These may then be simulated using either the VCell  
29 partial differential equations (PDE) deterministic solvers or the Smoldyn stochastic simulator.

30

31

## 32 Introduction

33  
34 The specification of all molecular species and interactions is usually the first step in modeling a  
35 biomolecular interaction network. However, for the interactions of multivalent or multistate molecules,  
36 the number of species and reactions can be combinatorially large (1, 2), making it impractical to specify  
37 the reaction network manually. Rule-based modeling (2, 3) overcomes this limitation by accounting for  
38 the complete set of reactions and species that arise when an initial (seed) set of species is transformed  
39 using reaction rules. The reaction rules can serve either as generators of individual reactions, expanding  
40 the initial set of species into the complete network of reactions and species, or as generators of  
41 stochastic events, producing molecular complexes with non-zero population numbers.

42  
43 Virtual Cell (VCell, <http://vcell.org>) is an open-source platform that provides powerful capabilities for  
44 kinetic modeling of cellular systems (4, 5) (Fig. 1). A key focus of VCell is to allow modelers to ask how  
45 spatial features of cells affect the system behavior. At the simplest level, the relative sizes of  
46 compartments affect the concentrations of species transported between them; models that account for  
47 the surface areas of membranes and the volumes of volumetric compartments, but assume that  
48 diffusion is fast on the timescale of reaction kinetics, will be referred to as 'compartmental'. If diffusion  
49 and spatial localization of molecular species can affect the biology, the geometric shapes of the  
50 membrane and volumetric compartments also need to be explicitly considered, and these models are  
51 considered 'spatial'.

52  
53 In building a VCell 'BioModel', users initially describe the system 'Physiology' with compartments  
54 defined as multiple volumes (e.g. extracellular space, cytosol, nucleus, endoplasmic reticulum, etc.) and  
55 surfaces (e.g. plasma membrane, mitochondrial membrane, etc.); the 'Physiology' also encompasses  
56 reactions and fluxes taking place within and between volumes and surfaces, with respective volume-  
57 and area-based units for concentrations and kinetic rate expressions. Once a 'Physiology' is defined in  
58 VCell, any number of 'Applications' can be defined, which specify the initial conditions, compartment  
59 sizes and/or geometries, and whether the system should be treated deterministically or stochastically.  
60 An 'Application' can be considered to be a virtual experiment and is sufficient to completely define the  
61 system's mathematical equations, which are automatically generated. VCell applications that do not  
62 include explicitly defined geometry (i.e. making the assumption that diffusion is fast on the timescale of  
63 all reaction kinetics) are called *compartmental*. These can be simulated using a variety of deterministic  
64 and stochastic numerical solvers (Fig. 1) to produce timecourses for concentrations and/or population  
65 numbers of species. Alternatively, an explicit geometry can be defined using a variety of methods, such  
66 as analytic equations in 1, 2 or 3D, constructed solid geometry in 3D, image-based (imported from  
67 various microscopy formats), mesh-based (imported from STL image), or drawn using provided drawing  
68 tools. Such VCell applications are called *spatial*, and diffusion for species must be defined in order to  
69 simulate timecourses. Diffusion can be defined in both volumetric compartments and along the surface  
70 of membranes, and reactions spanning multiple compartments account for species flux between these  
71 compartments. VCell offers several solvers for partial differential equations (4-7) to simulate spatial and  
72 temporal changes in concentration when the species copy numbers are large. When the copy numbers  
73 are low, a spatial stochastic simulator using the Smoldyn simulation engine (8) is available. VCell even

74 has a solver for spatial hybrid deterministic/stochastic simulations (9), to accommodate systems  
75 containing some species at high copy number (modeled as continuous concentrations and partial  
76 differential equations) and others at low copy number (modeled with stochastic reaction kinetics and  
77 Brownian motion).

78

79 Earlier versions of VCell required explicit specification of species and reactions. Last year we introduced  
80 VCell 6.0, which

81 incorporated a graphical  
82 user interface (GUI) to  
83 represent multiple sites  
84 and states within  
85 molecules and the rule-  
86 based reaction kinetics  
87 between them (10). This  
88 GUI provides a compact  
89 method for describing  
90 the key structural  
91 features of multivalent  
92 multistate molecules  
93 that control their roles in  
94 complex signaling  
95 systems. Every chemical  
96 species can be  
97 represented as  
98 structured objects  
99 composed of molecules,  
100 with reactions that  
101 control all their  
102 modifications and  
103 changes in their  
104 connectivity. Every

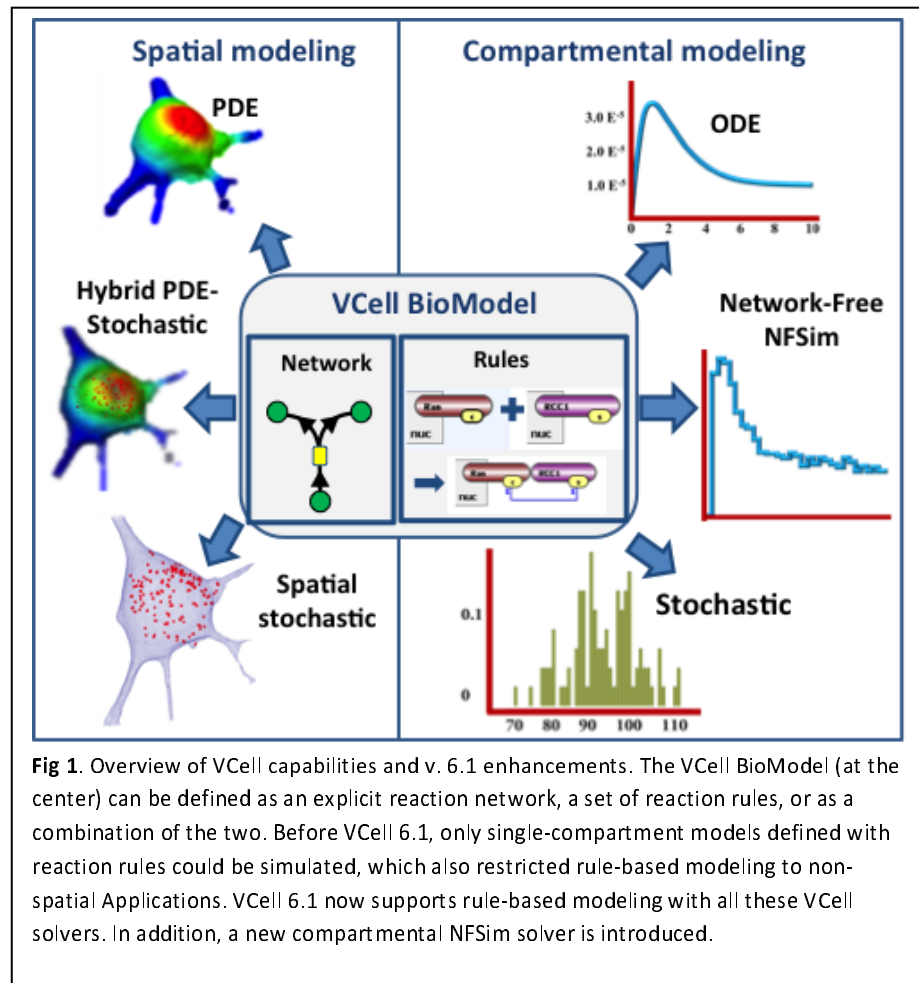

**Fig 1.** Overview of VCell capabilities and v. 6.1 enhancements. The VCell BioModel (at the center) can be defined as an explicit reaction network, a set of reaction rules, or as a combination of the two. Before VCell 6.1, only single-compartment models defined with reaction rules could be simulated, which also restricted rule-based modeling to non-spatial Applications. VCell 6.1 now supports rule-based modeling with all these VCell solvers. In addition, a new compartmental NFSim solver is introduced.

105 model can be simulated both as a reaction network (following network-generation using the BioNetGen  
106 engine), permitting both deterministic and stochastic simulations, or with the NFSim network-free  
107 algorithm, which produces stochastic simulations. However, the abstractions within the representations  
108 of molecules and rules, as well as the algorithms within the network generation and simulation engines  
109 did not include compartments or the ability to simulate reaction diffusion equations in explicit  
110 geometries.

111

112 In this paper we describe a compartmental extension of the rule-based modeling capabilities of VCell,  
113 available in VCell 6.1. It enables specification of the locations of molecules and rules. This required us to  
114 develop new abstractions to anchor molecules explicitly to volume or surface compartments. We then  
115 modified the BioNetGen code to support network generation within the VCell compartmental

116 formalism. This permitted us to support all the stochastic or deterministic, and non-spatial or spatial,  
 117 simulators available in VCell to simulate reaction networks generated by rules (Fig. 1). Additionally, we  
 118 modified the NFSim code (11) to support compartmental (albeit non-spatial) network-free simulations.

119

## 120 Results

121

122 Rule-based modeling in VCell is implemented by adapting the standalone software tools BioNetGen (3,  
 123 12) and NFSim (11). They allow both deterministic and stochastic simulations after the reaction network  
 124 is generated (BioNetGen) and network-free particle-based simulations (NFSim) in a single compartment.  
 125 Both tools operate using the BioNetGen Language, BNGL (12), which was originally designed to work  
 126 only for a single compartment.

127

128 A compartmental  
 129 extension of BNGL,  
 130 cBNGL (13), enables  
 131 explicit modeling of the  
 132 compartment topology of  
 133 the cell and its effects on  
 134 system dynamics using  
 135 the BioNetGen network  
 136 generation engine.  
 137 However, it is not suited  
 138 for VCell. The major  
 139 reason is that cellular  
 140 topology in cBNGL is  
 141 restricted to a  
 142 compartment graph in  
 143 which nodes represent  
 144 compartments and  
 145 directed edges represent  
 146 containership. This graph  
 147 must be a tree, a  
 148 membrane may contain  
 149 (and be contained in)  
 150 only a single volume  
 151 compartment, while a  
 152 volume compartment  
 153 may contain multiple  
 154 surface compartments  
 155 but be contained only by  
 156 a single membrane. This  
 157 cellular topology is more limited than the generalized topology available in VCell, where no restrictions

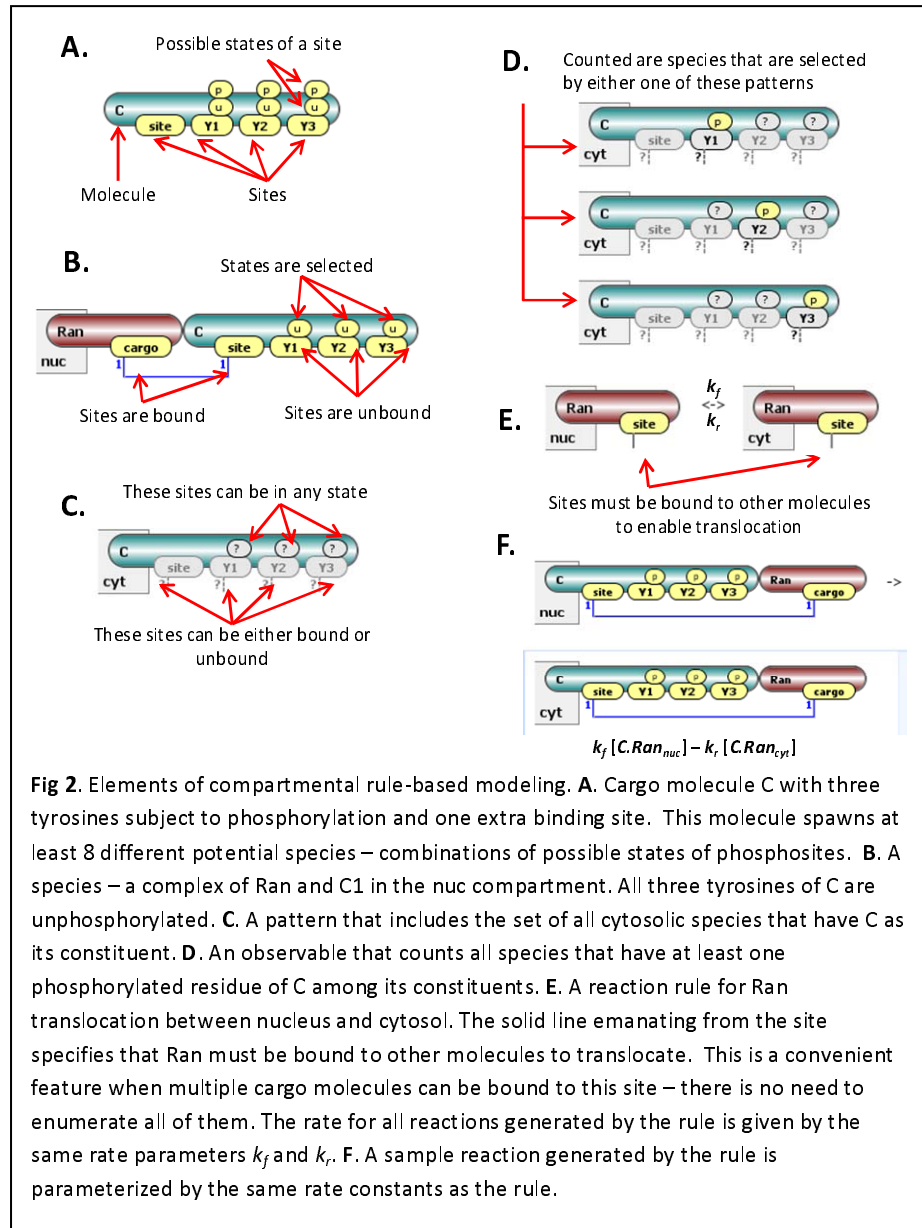

**Fig 2.** Elements of compartmental rule-based modeling. **A.** Cargo molecule C with three tyrosines subject to phosphorylation and one extra binding site. This molecule spawns at least 8 different potential species – combinations of possible states of phosphosites. **B.** A species – a complex of Ran and C1 in the nuc compartment. All three tyrosines of C are unphosphorylated. **C.** A pattern that includes the set of all cytosolic species that have C as its constituent. **D.** An observable that counts all species that have at least one phosphorylated residue of C among its constituents. **E.** A reaction rule for Ran translocation between nucleus and cytosol. The solid line emanating from the site specifies that Ran must be bound to other molecules to translocate. This is a convenient feature when multiple cargo molecules can be bound to this site – there is no need to enumerate all of them. The rate for all reactions generated by the rule is given by the same rate parameters  $k_f$  and  $k_r$ . **F.** A sample reaction generated by the rule is parameterized by the same rate constants as the rule.

158 are imposed on how compartments can be enclosed within each other. Likewise, cBNGL does not allow  
 159 for molecular species to span several membranes. The VCell paradigm gives the modeler more flexibility  
 160 and supports representation of multicellular structures with gap junctions or tight junctions.  
 161 Additionally, NFSim does not support compartmental simulations using cBNGL. Therefore, to enable  
 162 rule-based modeling in a generalized topology using both the BioNetGen and NFSim engines, we  
 163 decided to develop our own schema based on the VCell multi-compartment reaction diagram, where  
 164 the locations of each reactant, product, and of the reaction itself are explicitly specified. This required  
 165 new conventions for specifying spatial features within a regular BNGL file. We use the BioNetGen or  
 166 NFSim engines to generate the reactions, but have added a processing step after every iteration to fix  
 167 the location of each newly generated species and remove invalid species and reactions. While the BNGL  
 168 is hidden to the user, it is important to lay out the key algorithmic features that allow for merging of  
 169 rule-based

170

171 **Table 1. Concepts and definitions for compartmental rule-based modeling in VCell**

| Term               | Purpose                                                                                                            | Composition                                                                                                                                                                                                                                                                                                                                                                                                           | Compartmental/Spatial features                                                                                                                                                                                                  |
|--------------------|--------------------------------------------------------------------------------------------------------------------|-----------------------------------------------------------------------------------------------------------------------------------------------------------------------------------------------------------------------------------------------------------------------------------------------------------------------------------------------------------------------------------------------------------------------|---------------------------------------------------------------------------------------------------------------------------------------------------------------------------------------------------------------------------------|
| Compartment        | Cellular structure containing species and reactions                                                                | A volume or a surface, corresponding to extracellular regions, cytosol, organelles and their associated membranes. No specification of the relationship between compartments (such as enclosures or adjacency) is required.                                                                                                                                                                                           | For <b>Applications</b> without explicit geometries, compartmental sizes are specified as surface areas or volumes. For spatial <b>Applications</b> , compartments may be explicitly associated with regions within a geometry. |
| Molecule (Fig 2A). | A building block for species.                                                                                      | Comprised of sites that can bind other sites between or within molecules. A site may also have multiple states. In this way, a molecule spawns a collection of chemical species – one per every combination of site occupancy and/or state.                                                                                                                                                                           | Can be, optionally, <b>anchored</b> to one or more compartments. A species containing an anchored molecule can be located only in one of these compartments.                                                                    |
| Species (Fig 2B).  | An individual chemical species that may occur in the model.                                                        | Comprised of molecules that are connected through bonds between binding sites. All modification sites must be explicitly defined. A species can be a <b>seed species</b> (defined as initial condition and used as a seed for reaction rules application) or a generated species (a result of reaction rule application).                                                                                             | Every species is located in a unique compartment. Seed species are assigned to a compartment by the user. It may not contain molecules that are excluded from that compartment by anchoring to other compartments.              |
| Pattern (Fig 2C).  | Specifies a set of possible states of species to be selected as participants in reaction rules and in observables. | Comprised of molecules. The states of sites may be left unspecified; thus a pattern may select multiple species. Moreover, binding sites may have <b>implicit binding status</b> ( <i>has external bond or may be bound</i> ) where its binding partner is not explicitly defined. Such patterns may be inclusive of species that contain molecules not explicitly specified in a pattern but being possibly bound to | Defined in a single compartment; all molecules that comprise a pattern must be permitted to be located in this compartment.                                                                                                     |

|                         |                                                                                   |                                                                                                                                                                                                                                                                                                        |                                                                                                                                                                                                          |
|-------------------------|-----------------------------------------------------------------------------------|--------------------------------------------------------------------------------------------------------------------------------------------------------------------------------------------------------------------------------------------------------------------------------------------------------|----------------------------------------------------------------------------------------------------------------------------------------------------------------------------------------------------------|
|                         |                                                                                   | molecules within it.                                                                                                                                                                                                                                                                                   |                                                                                                                                                                                                          |
| Observable (Fig 2D).    | Specify simulation outputs of interest.                                           | Consists of one or more patterns that define features of species. The result is the total population (concentration or count) of multiple species.                                                                                                                                                     | Defined in a single compartment; all molecules that comprise an observable must be permitted to be located in this compartment.                                                                          |
| Reaction rule (Fig 2E). | Defines transformation of multiple species at once, generating multiple reactions | Species to be transformed are selected by reactant pattern(s). Product pattern(s) define the end result of transformation. Product may differ from reactant by re-assigning molecules, adding or deleting bonds and changing site states. A kinetic expression is also a component of a reaction rule. | Reaction rule is defined in a single compartment. Each reactant pattern and each product pattern are assigned a specific compartment, which may be different from compartment for reactants or products. |

172

173

174 modeling within the VCell architecture. We  
 175 describe these in Table 1 and Figure 2,  
 176 which also serve as a short glossary of rule-  
 177 based modeling terminology. Note that  
 178 while a species is located in a given  
 179 compartment, its orientation in space (as  
 180 may be required for agent-based  
 181 simulations) is implicitly determined by the  
 182 specification of binding reaction rules  
 183 between sites on molecules with different  
 184 locations. Supplemental material (S1.pdf)  
 185 discusses implementation in more detail.

186

187 Let us illustrate compartmental rule-based  
 188 modeling using a model of Ran-mediated  
 189 nucleocytoplasmic transport (available in  
 190 the VCell Database under Tutorials as  
 191 “Rule-Based\_Ran\_Transport”). This is a  
 192 simplified version of a published model by  
 193 Smith et al. (14). In this tutorial (Fig 3A), the  
 194 nuclear Ran binds to a cargo molecule,  
 195 facilitating translocation into the cytosol.  
 196 Ran and cargo then dissociate. The  
 197 cytosolic cargo molecule may be  
 198 phosphorylated on any of its three  
 199 tyrosines while in the cytosol. When cargo  
 200 is displaced by the Ran exchange factor RCC1, which is a component of histones, Ran stays in the  
 201 nucleus. The rule-based approach provides a compact way of describing such a system, with a single

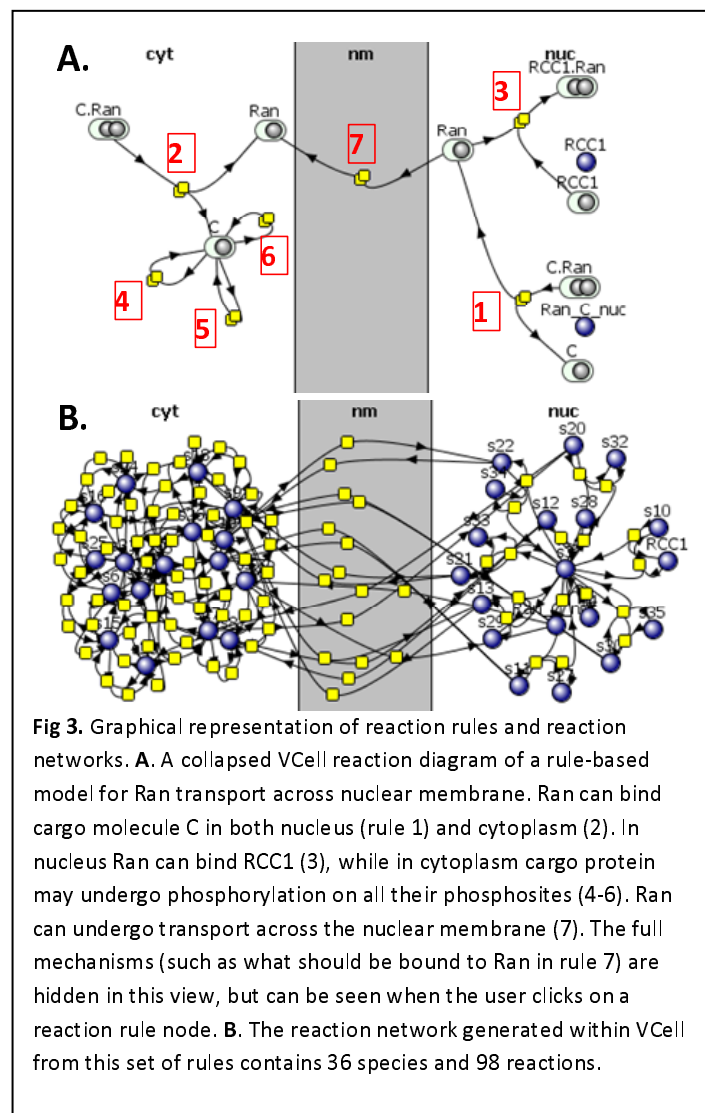

202 transport reaction rule (Fig 2E and #7 in Fig. 3A) in place of 18 reversible reactions for transport of  
203 multiple types of cargo. The total number of species and reactions, if all combinations of phosphoforms  
204 are accounted for, would be 36 and 98 respectively. Such a large system is difficult to construct, visualize  
205 and analyze without rule-based specification (Fig 3B). Moreover, model predictions have to be  
206 compared to experimental observations that often correspond to sums of multiple species. In our  
207 example, the total phosphorylation of cargo is summed over all species that have at least one site being  
208 phosphorylated, with triple-phosphorylated species counted three times. The observable concept (Fig.  
209 1D and Table 1) introduced in rule-based modeling provides an easy way to define such quantities.  
210

211 A feature of rule-based modeling is that anything not explicitly constrained is allowed. Thus, a transport  
212 reaction rule for Ran with a pattern specifying it must have a bound site (Fig 2E), will carry with it any of  
213 the molecules that may be bound to it, including RCC1, which should remain in the nucleus according to  
214 the known biology. To address this within the generalized topology of VCell, we introduced the ability to  
215 *anchor* molecules to compartments (Fig 4). A molecule can be anchored to one or multiple  
216 compartments. Anchoring a molecule to specific compartments constrains any species (produced  
217 through network generation or by NFSim)  
218 that contains this molecule to be in only  
219 these compartments. In spatial applications,  
220 such species are free to diffuse within  
221 compartments they are anchored to.  
222

223 As summarized in the introduction, VCell has  
224 a hierarchical architecture whereby the  
225 system 'Physiology' (exemplified by the  
226 network in Fig. 3 and all its underlying  
227 details) can be associated with several  
228 Applications. Applications are used to specify  
229 initial conditions, geometries and the  
230 physical and mathematical approaches by  
231 which the system should be simulated. New

232 Application types have been developed to provide control for network generation and to support a  
233 network-free simulations with NFSim. All the simulation methods previously available to manually  
234 constructed reaction networks are thereby now available to networks generated automatically from  
235 rules. Fig. 5 shows how the Physiology summarized in Fig. 3 can be used to produce compartmental  
236 deterministic (ODE), compartmental stochastic, compartmental network-free, spatial deterministic  
237 (PDE), spatial stochastic, and spatial hybrid deterministic/stochastic simulations. We believe that VCell is  
238 unique in making all these approaches available within one unified software environment; we are also  
239 unaware of any other systems biology software offering a spatial hybrid deterministic/stochastic  
240 solver(9).

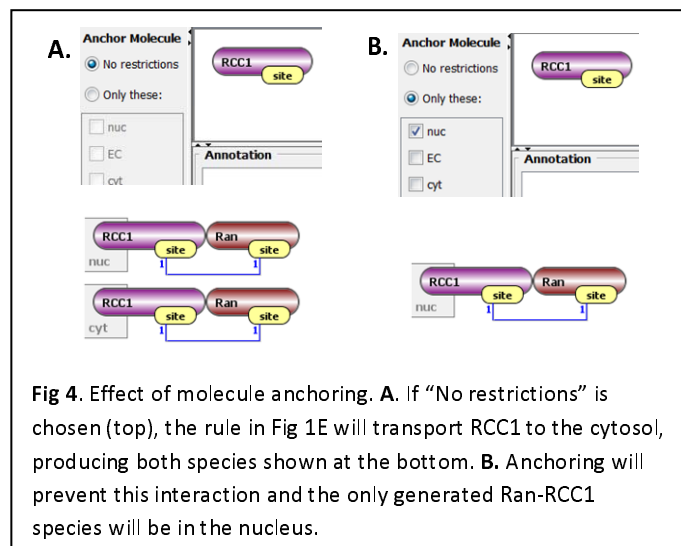

Fig 4. Effect of molecule anchoring. A. If "No restrictions" is chosen (top), the rule in Fig 1E will transport RCC1 to the cytosol, producing both species shown at the bottom. B. Anchoring will prevent this interaction and the only generated Ran-RCC1 species will be in the nucleus.



241

242 But VCell does not have pretensions of being a solution for every modeling problem. Accordingly, we  
243 have devoted significant effort to interoperability – in particular through the SBML standard (15).

244 Specifically for the  
245 case of rule-based  
246 modeling, a model  
247 defined in VCell can  
248 be exported to  
249 cBNGL (13) for  
250 simulation with the  
251 stand-alone  
252 BioNetGen engine.  
253 The generated  
254 cBNGL file has a  
255 new “anchors block”  
256 specifying molecules  
257 anchored to  
258 compartments. This  
259 block is ignored by  
260 the BioNetGen  
261 compiler. The  
262 exported cBNGL has  
263 no information  
264 about enclosing

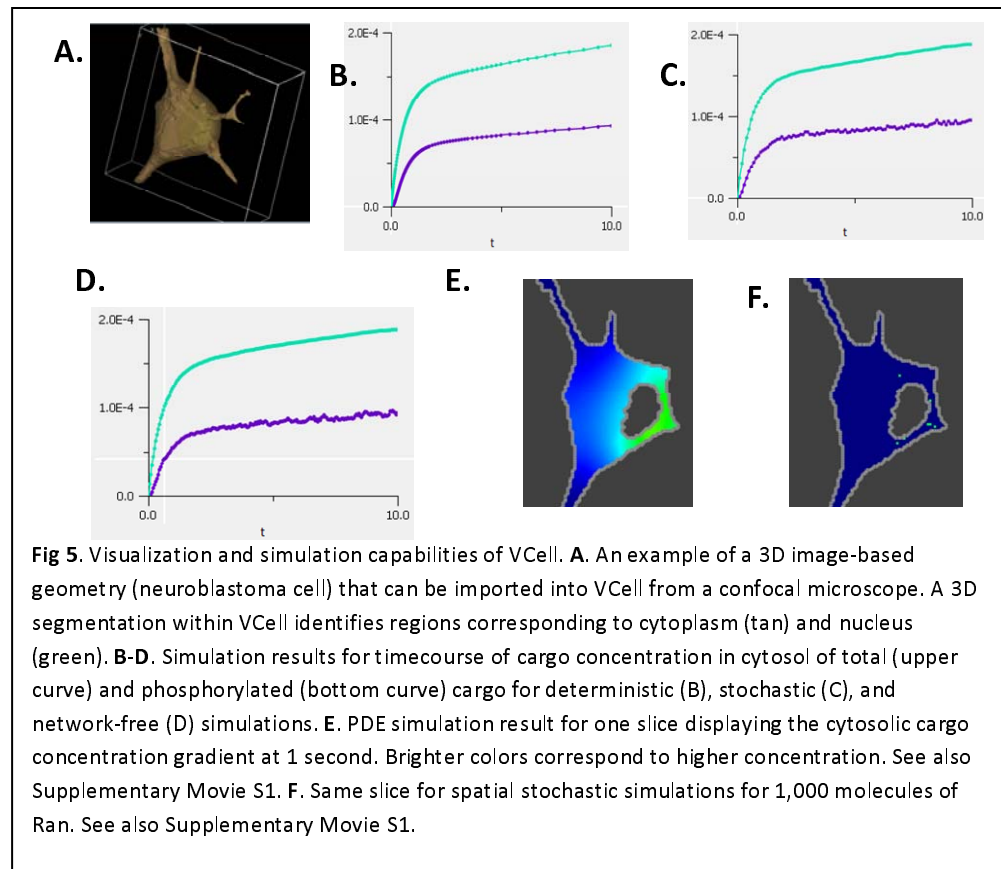

265 compartments in the compartment block. Thus, to simulate an exported model with the stand-alone  
266 BioNetGen engine, a modeler needs to specify a compartmental tree manually. Also, a model specified  
267 in cBNGL can be imported into VCell. Not every file can be seamlessly imported; errors will be displayed  
268 when compartment specification is done at a level of individual molecules in seed species and patterns.  
269 VCell provides a BNGL import editor where all inconsistencies are displayed and explained, so an  
270 experienced BioNetGen user should be able to fix all issues during the import process. Supplemental  
271 material S2.pdf provides more details on comparison between cBNGL and VCell representation.

272

## 273 Discussion

274

275 We have described a major enhancement of the VCell software to enable rule-based modeling in  
276 multiple compartments. This enhancement gives users with combinatorially complex biochemical  
277 systems the ability to specify all interactions and their dependencies in terms of molecular features such  
278 as cellular locations, sites for binding, modification states or conformations. To achieve this, we built a  
279 rich GUI that also serves to help visualize the details of these complex systems (Fig. 3). The VCell  
280 “classic” manual network generation functionality and GUI are still available and the implementation

281 actually supports mixing of automatically generated rule-based networks with reaction networks  
282 generated manually. Such networks can then be modeled with all the VCell compartmental and spatial  
283 simulation methods (Fig. 5). For network-free simulations, we have also modified the NFSim engine to  
284 support compartments.

285  
286 There are limitations to rule-based modeling that users should appreciate. One is the restriction of  
287 reaction kinetics to mass-action; however, the VCell user may be able to overcome this restriction for  
288 deterministic models by judiciously mixing rules and explicit network reactions. A second restriction is  
289 that the network-free simulations can only be run for non-spatial models. Additionally, for spatial  
290 models based on reaction networks generated by rules, care needs to be exercised not to allow a  
291 combinatorial explosion of species and reactions; the resultant large system of PDEs could produce  
292 prohibitively expensive computations.

293  
294 Several rule-based modeling tools that can operate in multiple compartments or perform spatial  
295 simulations are available: Simmune (16, 17), KaSim (18), Smoldyn (8), Meredys (19), SRSim (20), SSC (21)  
296 , SpringSaLaD (22). All of them are exclusively stochastic, whereas VCell offers deterministic spatial and  
297 hybrid deterministic/stochastic simulation capabilities. The VCell spatial stochastic solver is based on  
298 Smoldyn (23), adapted to permit users to incorporate experimental 3D image-based geometries in  
299 simulations; analytical geometries and constructive geometries can also be used. A variety of non-spatial  
300 compartmental simulators, both stochastic and deterministic, are also in VCell for quick answers when  
301 diffusion is fast on the timescale of reaction kinetics. Additionally, only Simmune and SpringSaLaD have  
302 biology-oriented GUIs, as in VCell, while all the other simulators are based on scripting. But the other  
303 more specialized simulators have important strengths that might be needed for certain classes of  
304 problems. SSC and Smoldyn both have implementations to employ high performance computing or gpus  
305 for computationally intensive simulations. Simmune is specialized for complex signaling in immunology.  
306 Meredys, SRSim and SpringSaLaD are all designed to account for molecular excluded volume effects and  
307 are therefore well suited for simulations where molecular crowding might be important. To facilitate  
308 interoperability with such other simulators, VCell supports the SBML standard (15) by enabling export  
309 and import of SBML models; it also supports cBNGL export, although some manual editing will be  
310 required.

311  
312 Model sharing is also facilitated within VCell through the VCell database. All models can be stored in the  
313 database along with simulations results that were run on the VCell server farm (although users may opt  
314 to save models and run simulations on their local machines). Access control is implemented to permit  
315 sharing of models with individual collaborators or to make a model openly accessible. Users may  
316 annotate model components to connect them to the primary literature sources as well as to ontologies  
317 and pathway databases. This is particularly valuable for molecules in rule-based models, where the  
318 localization and sites within a molecule can be directly related to both molecular structure and pathway  
319 data. Importantly, proper annotation can assure reusability of not just the entire model, but the  
320 individual molecules and rules.

321

### 322 **Software availability**

323 Available as VCell (versions 6.1 and later) at the Virtual Cell web site (<http://vcell.org/>). The application  
324 installs and runs on all major platforms and does not require registration for use on the user's computer.  
325 Tutorials are available at the Virtual Cell website and Help is provided within the software. Source code  
326 is available at <https://sourceforge.net/projects/vcell/>

327

328

329 **Acknowledgments.** The authors gratefully acknowledge useful discussions with James Faeder at  
330 University of Pittsburgh and Ann Cowan at UConn Health. The project is supported by the National  
331 Institute of General Medical Science through grants P41 GM103313 and R01 GM095485.

332

333

### 334 **Supporting Material**

335

336 Supplemental text 1 describes materials and methods. Supplemental text 2 contains a quick software  
337 guide. Supplemental movies describe simulation results for spatial deterministic and stochastic  
338 applications.

339

340

341

342

### 343 **References**

344

345

- 346 1. Mayer, B. J., M. L. Blinov, and L. M. Loew. 2009. Molecular machines or pleiomorphic  
347 ensembles: signaling complexes revisited. *J Biol* 8:81.81-81.88.
- 348 2. Faeder, J. R., M. L. Blinov, B. Goldstein, and W. S. Hlavacek. 2005. Combinatorial complexity and  
349 dynamical restriction of network flows in signal transduction. *Syst Biol (Stevenage)* 2:5-15.
- 350 3. Blinov, M. L., J. R. Faeder, B. Goldstein, and W. S. Hlavacek. 2004. BioNetGen: Software for rule-  
351 based modeling of signal transduction based on the interactions of molecular domains.  
352 *Bioinformatics* 20.
- 353 4. Cowan, A. E., Moraru, II, J. C. Schaff, B. M. Slepchenko, and L. M. Loew. 2012. Spatial modeling  
354 of cell signaling networks. *Methods Cell Biol* 110:195-221.
- 355 5. Schaff, J., C. C. Fink, B. Slepchenko, J. H. Carson, and L. M. Loew. 1997. A general computational  
356 framework for modeling cellular structure and function. *Biophysical journal* 73:1135-1146.
- 357 6. Schaff, J. C., B. M. Slepchenko, Y. S. Choi, J. Wagner, D. Resasco, and L. M. Loew. 2001. Analysis  
358 of nonlinear dynamics on arbitrary geometries with the Virtual Cell. *Chaos* 11:115-131.
- 359 7. Resasco, D. C., F. Gao, F. Morgan, I. L. Novak, J. C. Schaff, and B. M. Slepchenko. 2012. Virtual  
360 Cell: computational tools for modeling in cell biology. *Wiley Interdiscip Rev Syst Biol Med* 4:129-  
361 140.
- 362 8. Andrews, S. S. 2017. Smoldyn: particle-based simulation with rule-based modeling, improved  
363 molecular interaction and a library interface. *Bioinformatics* 33:710-717.
- 364 9. Schaff, J. C., F. Gao, Y. Li, I. L. Novak, and B. M. Slepchenko. 2016. Numerical Approach to Spatial  
365 Deterministic-Stochastic Models Arising in Cell Biology. *PLoS Comput Biol* 12:e1005236.
- 366 10. Schaff, J. C., D. Vasilescu, I. I. Moraru, L. M. Loew, and M. L. Blinov. 2016. Rule-based Modeling  
367 with Virtual Cell. *Bioinformatics* 32:2880-2882.

- 368 11. Sneddon, M. W., J. R. Faeder, and T. Emonet. 2011. Efficient modeling, simulation and coarse-  
369 graining of biological complexity with NFsim. *Nat Methods* 8:177-183.
- 370 12. Faeder, J. R., M. L. Blinov, and W. S. Hlavacek. 2009. Rule-based modeling of biochemical  
371 systems with BioNetGen. *Methods Mol Biol* 500:113-167.
- 372 13. Harris, L. A., J. S. Hogg, and J. R. Faeder. 2009. Compartmental rule-based modeling of  
373 biochemical systems. In *Winter Simulation Conference*. 908-919.
- 374 14. Smith, A. E., B. M. Slepchenko, J. C. Schaff, L. M. Loew, and I. G. Macara. 2002. Systems analysis  
375 of Ran transport. *Science* 295:488-491.
- 376 15. Hucka, M., A. Finney, H. M. Sauro, H. Bolouri, J. C. Doyle, H. Kitano, A. P. Arkin, B. J. Bornstein, D.  
377 Bray, A. Cornish-Bowden, A. A. Cuellar, S. Dronov, E. D. Gilles, M. Ginkel, V. Gor, Goryanin, I. W.  
378 J. Hedley, T. C. Hodgman, J. H. Hofmeyr, P. J. Hunter, N. S. Juty, J. L. Kasberger, A. Kremling, U.  
379 Kummer, N. Le Novère, L. M. Loew, D. Lucio, P. Mendes, E. Minch, E. D. Mjolsness, Y. Nakayama,  
380 M. R. Nelson, P. F. Nielsen, T. Sakurada, J. C. Schaff, B. E. Shapiro, T. S. Shimizu, H. D. Spence, J.  
381 Stelling, K. Takahashi, M. Tomita, J. Wagner, and J. Wang. 2003. The systems biology markup  
382 language (SBML): a medium for representation and exchange of biochemical network models.  
383 *Bioinformatics* 19:524-531.
- 384 16. Angermann, B. R., F. Klauschen, A. D. Garcia, T. Prustel, F. Zhang, R. N. Germain, and M. Meier-  
385 Schellersheim. 2012. Computational modeling of cellular signaling processes embedded into  
386 dynamic spatial contexts. *Nat Methods* 9:283-289.
- 387 17. Zhang, F., B. R. Angermann, and M. Meier-Schellersheim. 2013. The Simmune Modeler visual  
388 interface for creating signaling networks based on bi-molecular interactions. *Bioinformatics*  
389 29:1229-1230.
- 390 18. Sorokina, O., A. Sorokin, J. Douglas Armstrong, and V. Danos. 2013. A simulator for spatially  
391 extended kappa models. *Bioinformatics* 29:3105-3106.
- 392 19. Tolle, D. P., and N. L. Novère. 2010. Meredys, a multi-compartment reaction-diffusion simulator  
393 using multistate realistic molecular complexes. *BMC Syst Biol.* 4.
- 394 20. Gruenert, G., B. Ibrahim, T. Lenser, M. Lohel, T. Hinze, and P. Dittrich. 2010. Rule-based spatial  
395 modeling with diffusing, geometrically constrained molecules. *BMC Bioinformatics* 11.
- 396 21. Lis, M., M. N. Artyomov, S. Devadas, and A. K. Chakraborty. 2009. Efficient stochastic simulation  
397 of reaction-diffusion processes via direct compilation. *Bioinformatics* 25:2289-2291.
- 398 22. Michalski, P. J., and L. M. Loew. 2016. SpringSaLaD: A Spatial, Particle-Based Biochemical  
399 Simulation Platform with Excluded Volume. *Biophysical journal* 110:523-529.
- 400 23. Andrews, S. S., N. J. Addy, R. Brent, and A. P. Arkin. 2010. Detailed simulations of cell biology  
401 with Smoldyn 2.1. *PLoS computational biology* 6:e1000705.
